# Supplementary material for: Ethylene Acts as a Local and Systemic Signal to Mediate UV-B-Induced Nitrate Reallocation to Arabidopsis Leaves and Roots via Regulating the ERFs-NRT1.8 Signaling Module
Source: MDPI journal article supplement (doi:10.3390/ijms23169068), 2022-08-13
Supplement: s1 [file s1]

## Supplementary materials

**Table S1.** List of primers used in this study

| Primer Name     | Primer Sequence (5'-3')    |
|-----------------|----------------------------|
| <i>NRT1.8-F</i> | TCTTCATCTTCGCATACAGGCGGT   |
| <i>NRT1.8-R</i> | GCCATTATCGCAATCACAAGCCCA   |
| <i>ORA59-F</i>  | AAGGGATAAGAGTGTGGCTTGGGA   |
| <i>ORA59-R</i>  | CTTTCAAAGCGAAAGCCGCCTGAT   |
| <i>ERF1B-F</i>  | GAGGAAACACTCGATGAGACG      |
| <i>ERF1B-R</i>  | GGAGCGGTGATCAAAGTCAC       |
| <i>ERF104-F</i> | GAACCATCACCAACCAATCC       |
| <i>ERF104-R</i> | GTCCCAAGCCAGATCCTACA       |
| <i>ACS2-F</i>   | GACATCGCTAATTTCCAAGACTACCA |
| <i>ACS2-R</i>   | TCCTCCGCTCATAACCACCCTCT    |
| <i>ACS4-F</i>   | CTTTCTTGCTTCCCACGCCATAT    |
| <i>ACS4-R</i>   | TCTTGGCTTGCTCGTAGGCTTCT    |
| <i>ACS5-F</i>   | GCTATGGCTGAGTTTATGGAAGA    |
| <i>ACS5-R</i>   | ATCCAGGATAGTAAGGAGTAGGC    |
| <i>ACS6-F</i>   | CGAGTTTCGGTCTTGTTTCGTCA    |
| <i>ACS6-R</i>   | GTGGTTATCTCAGCGTGCCTTGC    |
| <i>ACS7-F</i>   | GCTTCACGCTTGTCTCGTCTCAG    |
| <i>ACS7-R</i>   | TCCCTTTCAAACACTCAATCCCT    |
| <i>ACS8-F</i>   | GGGTGATTACTCCAACGATGAT     |
| <i>ACS8-R</i>   | CTGATAACAATGCGGACAAGAGG    |
| <i>ACS11-F</i>  | GCAGGTTTGTTCTGTTGGGTGA     |
| <i>ACS11-R</i>  | CATCGTTTGGTCCGACATATTCG    |
| <i>ACO1-F</i>   | AGGAACTCAGCAAGACGATG       |
| <i>ACO1-R</i>   | AAGAACTCAAGACCAGGCAC       |
| <i>ACO2-F</i>   | CGGGAAGTATAAGAGTGTGCTG     |

---

|                 |                         |
|-----------------|-------------------------|
| <i>ACO2-R</i>   | GGGTACTCGGAATCTTTCTCG   |
| <i>ACO3-F</i>   | GATGGTGATTGGGTTGATGTTT  |
| <i>ACO3-R</i>   | AGTCCGGCATAGAGTTTCATG   |
| <i>ACO4-F</i>   | TTTCTACCTCAAGCACCTTCC   |
| <i>ACO4-R</i>   | AACTTCTCTATCTTTCCGGCG   |
| <i>ACO5-F</i>   | GGAGGTGTCGTTTTGCTTTTC   |
| <i>ACO5-R</i>   | ACTCTTGTAACCTCCGTTGC    |
| <i>ACTIN2-F</i> | CAAGGCCGAGTATGATGAGG    |
| <i>ACTIN2-R</i> | GAAACGCAGACGTAAGTAAAAAC |

---

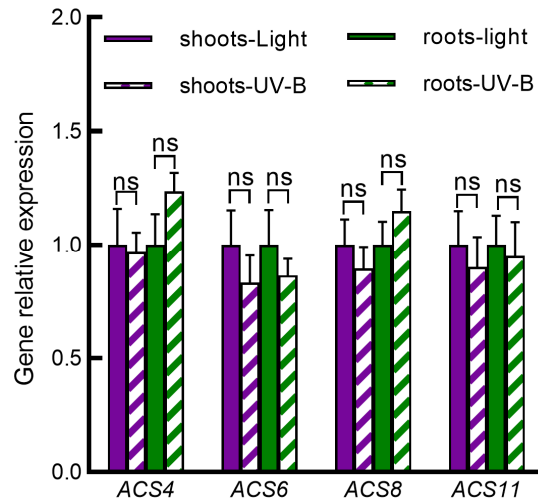

**Figure S1.** Effect of UV-B on expression of ACS genes in wild-type Col-0 shoots and roots. Expression of ACS genes were determined by qPCR in shoots and roots of 20-day-old wild-type Col-0 plants exposed to light alone (Light) or with 0.5 W/m<sup>2</sup> UV-B (UV-B) for 3 h. Data are means  $\pm$  SE of three biological replicates and presented as values relative to those under light treatment after normalization to those of *ACTIN2*. Bars with “ns” indicate no significant difference from those under light treatments.

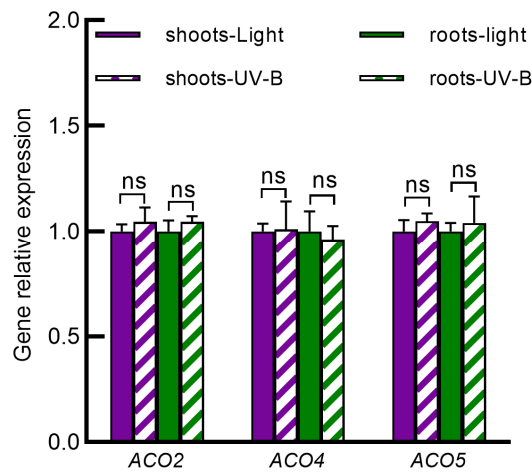

**Figure S2.** Effect of UV-B on expression of ACO genes in wild-type Col-0 shoots and roots. Expression of ACO genes were determined by qPCR in shoots and roots of 20-day-old wild-type Col-0 plants exposed to light alone (Light) or with 0.5 W/m<sup>2</sup> UV-B (UV-B) for 3 h. Data are means  $\pm$  SE of three biological replicates and presented as values relative to those under light treatment after normalization to those of *ACTIN2*. Bars with “ns” indicate no significant difference from those under light treatments.
